# Supplementary material
Source: MDPI journal article supplement (https://www.mdpi.com/2073-8994/13/12/2348)
Supplement: s1 [file s1]

# Supplementary Material

**Table S1.**

Participant characteristics - differences between protocols by sex of the participants (t-test for independent samples was used when normality of the data was confirmed by Shapiro-Wilk test; † – Mann-Whitney test was used if the data were not normally distributed; \* p< 0.05)

|                                  | Men                |                    |               | Women              |                    |       |
|----------------------------------|--------------------|--------------------|---------------|--------------------|--------------------|-------|
|                                  | Supine             | Upright            | p             | Supine             | Upright            | p     |
| N (%)                            | 28 (40.1)          | 41 (49.9)          | -             | 28 (40.0)          | 42 (60.0)          | -     |
| Median Age, years (min – max) †  | 20.5 (18.0 – 66.0) | 30.0 (18.0 – 58.0) | 0.267         | 22.5 (18.0 – 62.0) | 22.5 (19.0 – 59.0) | 0.894 |
| Mean Height, meters (SD)         | 1.8 (0.1)          | 1.8 (0.1)          | <b>0.020*</b> | 1.6 (0.1)          | 1.6 (0.1)          | 0.391 |
| Mean Weight, kg (SD)             | 76.1 (10.0)        | 74.6 (9.5)         | 0.518         | 60.5 (9.1)         | 62.8 (12.1)        | 0.435 |
| Mean BMI, kg/m <sup>2</sup> (SD) | 23.9 (2.9)         | 24.4 (2.3)         | 0.398         | 22.9 (3.3)         | 23.3 (4.4)         | 0.691 |
| Mean SYS (SD)                    | 118.9 (11.2)       | 122.0 (14.1)       | 0.233         | 113.8 (13.9)       | 118.3 (11.4)       | 0.084 |
| Mean DIA (SD)                    | 74.4 (9.2)         | 71.4 (7.9)         | 0.156         | 74.4 (7.3)         | 71.6 (10.7)        | 0.270 |
| Median ABI (min – max) †         | 1.1 (1.0– 1.3)     | 1.1 (1.0– 1.8)     | 0.878         | 1.1 (1.0 – 1.3)    | 1.0 (0.9 – 1.4)    | 0.083 |

**Table S2.**

Participant characteristics - differences between men and women according to the protocol at baseline († -t-test for independent samples was used when normality of the data was confirmed by Shapiro-Wilk test; ∞ – Mann-Whitney test was used if the data were not normally distributed)

|                                  | Supine             |                    |                    | Upright            |                    |                    |
|----------------------------------|--------------------|--------------------|--------------------|--------------------|--------------------|--------------------|
|                                  | Men                | Women              | p                  | Men                | Women              | p                  |
| N (%)                            | 28 (50)            | 28 (50)            | -                  | 41 (49.4)          | 42 (50.6)          | -                  |
| Median Age, years (min – max)    | 20.5 (18.0 – 66.0) | 22.5 (18.0 – 62.0) | 0.405 <sup>∞</sup> | 30.0 (18.0 – 58.0) | 22.5 (19.0 – 59.0) | 0.132 <sup>∞</sup> |
| Mean Height, meters (SD)         | 1.8 (0.1)          | 1.6 (0.1)          | <b>&lt;0.001</b> † | 1.8 (0.1)          | 1.6 (0.1)          | <b>&lt;0.001</b> † |
| Mean Weight, kg (SD)             | 76.1 (10.0)        | 60.5 (9.1)         | <b>&lt;0.001</b> † | 74.6 (9.5)         | 62.7 (12.1)        | <b>&lt;0.001</b> † |
| Mean BMI, kg/m <sup>2</sup> (SD) | 23.9 (2.9)         | 22.9 (3.3)         | 0.223†             | 24.4 (2.3)         | 23.3 (4.4)         | 0.136†             |
| Mean SYS (SD)                    | 118.2 (11.2)       | 113.8 (13.9)       | 0.124†             | 122.0 (14.1)       | 118.3 (11.4)       | 0.184†             |
| Mean DIA (SD)                    | 74.4 (9.2)         | 74.4 (7.3)         | 0.918†             | 71.4 (7.9)         | 71.6 (10.7)        | 0.932†             |
| Median ABI (min – max)           | 1.1 (1.0– 1.3)     | 1.1 (1.0 – 1.3)    | 0.958 <sup>∞</sup> | 1.1 (1.0 – 1.8)    | 1.0 (0.9 – 1.4.)   | 0.104 <sup>∞</sup> |

**Table S3.**

Perfusion differences between right and left limbs obtained in baseline and recovery phases of the experimental protocols. Results are shown by sex considering body position (supine or upright). Results are expressed as median (Q1-Q3) LDF Values expressed in BPU (blood perfusion units). Statistical differences were assessed by the Wilcoxon signed rank test; \*  $p < 0.05$ )

|       |         | Baseline               |                       |       | Recovery               |                       |       |
|-------|---------|------------------------|-----------------------|-------|------------------------|-----------------------|-------|
|       |         | Right foot,<br>(Q1-Q3) | Left foot,<br>(Q1-Q3) | p     | Right foot,<br>(Q1-Q3) | Left foot,<br>(Q1-Q3) | p     |
| Men   | Supine  | 10.1<br>(6.7 - 15.6)   | 9.6<br>(5.1 - 17.0)   | 0.616 | 9.5<br>(5.9 - 15.1)    | 7.9<br>(4.8 - 19.2)   | 0.641 |
|       | Upright | 9.4<br>(7.3 - 11.6)    | 9.5<br>(6.5 - 13.0)   | 0.946 | 8.4<br>(6.4 - 11.2)    | 8.8<br>(6.1 - 13.6)   | 0.219 |
| Women | Supine  | 6.3<br>(3.9 - 9.3)     | 6.5<br>(4.9 - 10.3)   | 0.943 | 6.4<br>(3.7 - 10.9)    | 6.2<br>(4.6 - 10.5)   | 0.516 |
|       | Upright | 8.5<br>(7.0 - 11.1)    | 8.1<br>(6.2 - 11.0)   | 0.914 | 8.9<br>(6.8 - 11.0)    | 8.2<br>(6.1 - 10.8)   | 0.554 |

**Table S4.**

Differences of LDF perfusion values, expressed in blood perfusion units (BPU), detected in baseline and recovery phases of experimental protocols by sex considering body position (supine or upright). Statistical differences were assessed by the Mann-Whitney test. (\*  $p < 0.05$ ). r thresholds for effect size of 0.1, 0.3, and 0.5 for small, medium, and large effect sizes, respectively.

| Median values of LDF<br>(Q1-Q3) |                                        | Supine             |                     |               |       | Upright            |                   |       |       |
|---------------------------------|----------------------------------------|--------------------|---------------------|---------------|-------|--------------------|-------------------|-------|-------|
|                                 |                                        | Men                | Women               | p             | r     | Men                | Women             | P     | r     |
| BASELINE                        | Right foot                             | 10.1 (6.7 - 15.5)  | 6.3 (3.9 - 9.3)     | <b>0.007*</b> | 0.630 | 9.4 (7.3 - 11.6)   | 8.5 (7.0 - 11.0)  | 0.349 | 0.075 |
|                                 | Left foot                              | 9.6 (5.1 - 17.0)   | 6.5 (4.9 - 10.3)    | 0.063         | 1.241 | 9.5 (6.5 - 13.0)   | 8.1 (6.2 - 11.0)  | 0.252 | 0.245 |
|                                 | Dominant foot                          | 11.0 (7.6 - 18.3)  | 7.4 (6.0 - 11.7)    | <b>0.026*</b> | 0.839 | 11.3 (7.4 - 13.7)  | 9.5 (7.4 - 11.9)  | 0.179 | 0.345 |
|                                 | Contralateral foot                     | 9.1 (4.7 - 12.8)   | 5.7 (3.4 - 6.6)     | <b>0.017*</b> | 0.976 | 8.8 (6.1 - 10.1)   | 7.5 (5.8 - 9.0)   | 0.239 | 0.031 |
|                                 | Dominant/Contralateral ratio % (Q1-Q3) | 39.1 (15.2 - 65.9) | 50.5 (20.0 - 104.3) | 0.334         | 0.018 | 23.1 (11.7 - 40.4) | 14.3 (7.8 - 46.1) | 0.510 | 0.007 |
| RECOVERY                        | Right foot                             | 9.5 (5.9 - 15.1)   | 6.4 (3.7 - 10.9)    | <b>0.017*</b> | 0.730 | 8.4 (6.4 - 11.2)   | 8.9 (6.8 - 11.0)  | 0.922 | 0.133 |
|                                 | Left foot                              | 7.9 (4.8 - 19.2)   | 6.2 (4.6 - 10.5)    | 0.149         | 0.636 | 8.8 (6.1 - 13.6)   | 8.2 (6.1 - 10.8)  | 0.439 | 0.186 |
|                                 | Dominant foot                          | 12.0 (6.5 - 19.2)  | 7.5 (5.5 - 12.5)    | <b>0.035*</b> | 0.738 | 11.0 (7.7 - 15.0)  | 9.8 (7.9 - 11.8)  | 0.297 | 0.164 |
|                                 | Contralateral foot                     | 7.5 (4.1 - 14.4)   | 5.4 (3.4 - 9.1)     | 0.062         | 0.605 | 6.4 (5.6 - 9.8)    | 6.9 (5.5 - 8.6)   | 0.856 | 0.113 |
|                                 | Dominant/Contralateral ratio % (Q1-Q3) | 36.5 (14.4 - 64.6) | 38.4 (14.3 - 69.8)  | 0.928         | 0.110 | 32.3 (18.7 - 63.7) | 23.8 (9.2 - 61.3) | 0.241 | 0.352 |

**Table S5.**

Differences of LDF perfusion values expressed in blood perfusion units (BPU) detected in baseline and recovery phases of experimental protocols by body position (supine or upright) in men and women. Statistical differences were assessed by the Mann-Whitney test. (\*  $p < 0.05$ ).  $r$  thresholds for effect size of 0.1, 0.3, and 0.5 for small, medium, and large effect sizes, respectively.

| Median values of LDF<br>(Q1-Q3) |                                        | MEN                |                    |       |       | WOMEN               |                   |               |       |
|---------------------------------|----------------------------------------|--------------------|--------------------|-------|-------|---------------------|-------------------|---------------|-------|
|                                 |                                        | Supine             | Upright            | p     | r     | Supine              | Upright           | p             | r     |
| BASELINE                        | Right foot                             | 10.1 (6.7 – 15.5)  | 9.4 (7.3 – 11.6)   | 0.347 | 0.923 | 6.3 (3.9 – 9.3)     | 8.5 (7.0 – 11.0)  | <b>0.016*</b> | 0.462 |
|                                 | Left foot                              | 9.7 (5.1 – 17.0)   | 9.5 (6.5 – 13.0)   | 0.951 | 1.433 | 6.5 (4.9 – 10.3)    | 8.1 (6.2 – 11.0)  | <b>0.048*</b> | 0.002 |
|                                 | Dominant foot                          | 11.0 (7.6 – 18.3)  | 11.3 (7.4 – 13.7)  | 0.566 | 1.149 | 7.4 (6.0 – 11.7)    | 9.5 (7.4 – 11.9)  | 0.112         | 0.498 |
|                                 | Contralateral foot                     | 9.1 (4.7 – 12.8)   | 8.8 (6.1 – 10.1)   | 0.826 | 1.178 | 5.7 (3.4 – 6.6)     | 7.5 (5.8 – 9.0)   | <b>0.003*</b> | 0.023 |
|                                 | Dominant/Contralateral ratio % (Q1-Q3) | 39.1 (15.2 – 65.8) | 23.1 (11.7 – 40.4) | 0.107 | 0.247 | 50.5 (20.0 – 104.3) | 14.3 (7.8 – 46.1) | <b>0.009*</b> | 0.931 |
| RECOVERY                        | Right foot                             | 9.5 (5.9 – 15.1)   | 8.4 (6.4 – 11.2)   | 0.313 | 1.199 | 6.4 (3.7 – 11.0)    | 8.9 (6.8 – 11.0)  | <b>0.013*</b> | 0.804 |
|                                 | Left foot                              | 7.9 (4.8 – 19.2)   | 8.8 (6.1 – 13.6)   | 0.835 | 0.955 | 6.2 (4.6 – 10.5)    | 8.2 (6.1 – 10.8)  | 0.095         | 0.306 |
|                                 | Dominant foot                          | 12.0 (6.5 – 19.2)  | 11.0 (7.7 – 15.0)  | 0.647 | 1.213 | 7.5 (5.5 – 12.5)    | 9.8 (7.9 – 11.8)  | <b>0.044*</b> | 0.685 |
|                                 | Contralateral foot                     | 7.5 (4.1 – 14.4)   | 6.4 (5.6 – 9.8)    | 0.578 | 0.994 | 5.4 (3.4 – 9.1)     | 6.9 (5.5 – 8.6)   | <b>0.010*</b> | 0.654 |
|                                 | Dominant/Contralateral ratio % (Q1-Q3) | 36.5 (14.4 – 64.6) | 32.3 (18.6 – 63.6) | 0.971 | 0.006 | 38.4 (14.3 – 69.8)  | 23.8 (9.2 – 61.3) | 0.277         | 0.050 |
